# Supplementary material for: Difference in hot carrier cooling rate between Langmuir–Blodgett and drop cast PbS QD films due to strong electron–phonon coupling
Source: Royal Society of Chemistry journal article supplement (doi:10.1039/c7nr05247b), 2017-01-01
Supplement: c7nr05247b1.pdf [file c7nr05247b1.pdf]

## Supporting Information

# Difference in hot carrier cooling rate between Langmuir-Blodgett and drop cast PbS QDs films due to strong electron-phonon coupling

Wenkai Cao<sup>a</sup>; Yuan Lin<sup>a</sup>, Rob Patterson<sup>a</sup>, Xiaoming Wen<sup>a</sup>, Patrick C. Tapping<sup>c</sup>, Tak Kee<sup>c</sup>, Binesh Puthen Veetil<sup>a</sup>, Pengfei Zhang<sup>a</sup>, Zewen Zhang<sup>a</sup>, Qiuyang Zhang<sup>a</sup>, Peter Reece<sup>b</sup>, Stephen Bremner<sup>a</sup>, Santosh Shrestha<sup>a</sup>, Gavin Conibeer<sup>a</sup>, Shujuan Huang<sup>a\*</sup>

<sup>a</sup>*School of Photovoltaic and Renewable Energy Engineering, UNSW Sydney, Sydney NSW 2052, Australia*

<sup>b</sup>*School of Physics, UNSW Sydney, Sydney NSW 2052, Australia*

<sup>c</sup>*Department of Chemistry, The University of Adelaide, South Australia 5005, Australia*

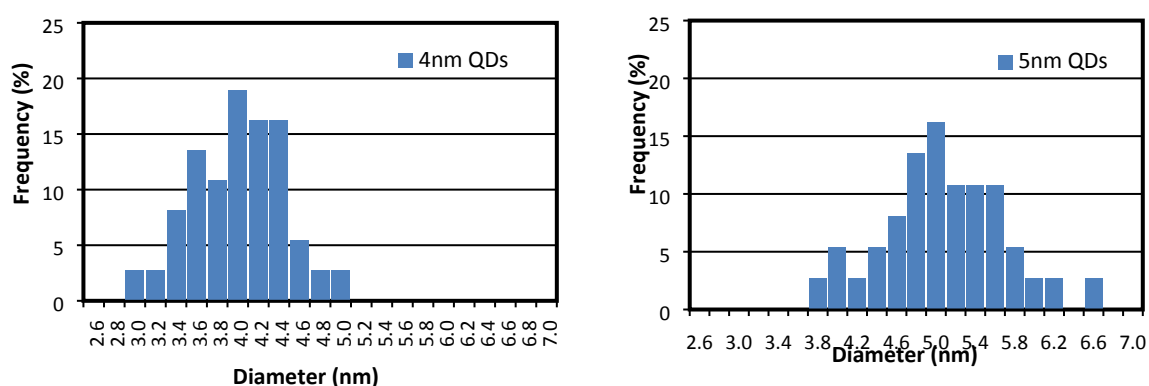

Figure S1. Size distribution histogram plots of 4 nm and 5 nm PbS QDs estimated from TEM images.

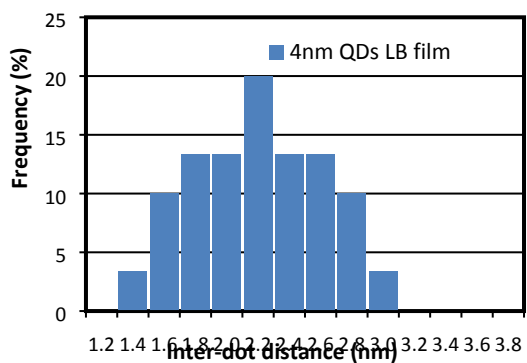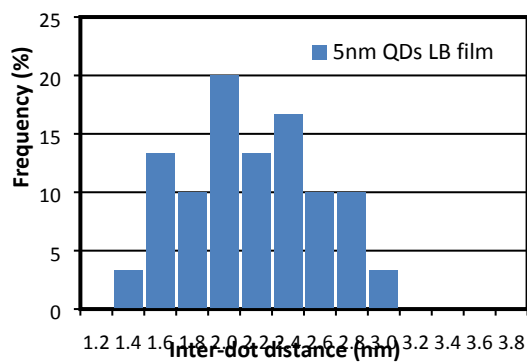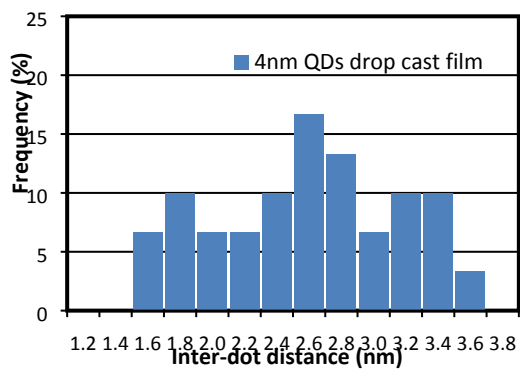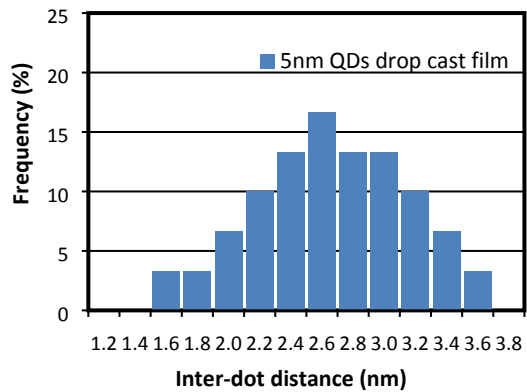

Figure S2. Distribution histograms of the inter-dot distance in the QD LB films and drop cast films.
